# Supplementary material for: Glucuronidated Metabolites of Bisphenols A and S Alter the Properties of Normal Urothelial and Bladder Cancer Cells
Source: MDPI journal article supplement (doi:10.3390/ijms232112859), 2022-10-25
Supplement: s1 [file s1]

## SUPPLEMENTARY FIGURES

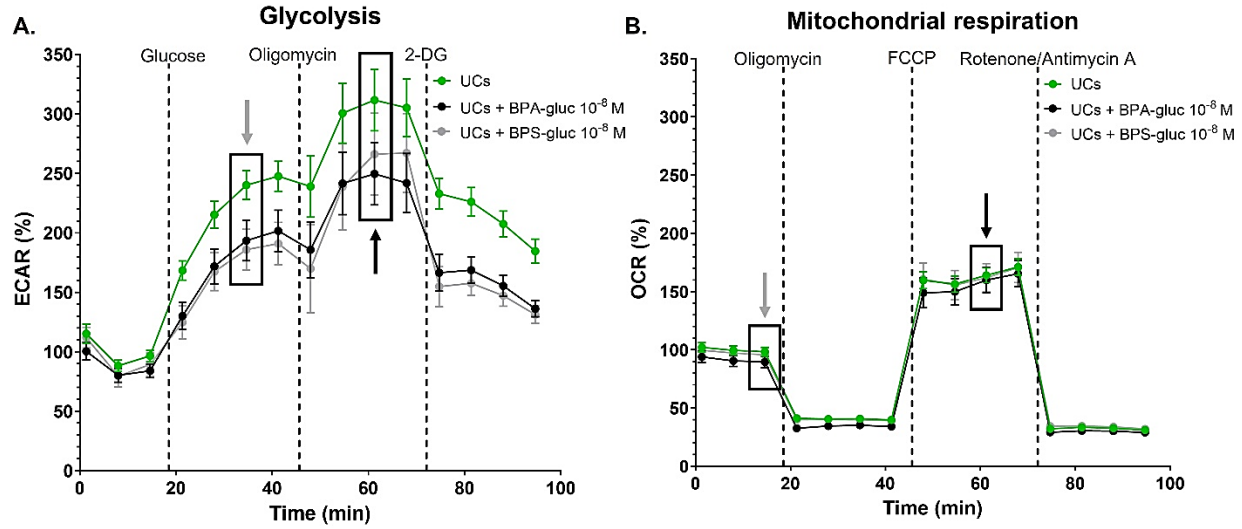

**Figure S1. Impact of BPA-gluc and BPS-gluc on the glycolytic and mitochondrial metabolism of normal urothelial cells (UCs).** (A) The glycolytic metabolism was established by the sequential injections of glucose, oligomycin and 2-DG. Analyses in Figure 1A-B were performed using measure #6 (gray arrow) for basal glycolysis and measure #10 (black arrow) for maximal glycolytic capacity. (B) The mitochondrial respiration was established by sequential injections of oligomycin, FCCP and the combination of rotenone and antimycin A. Analyses in Figure 1C-D were performed using measure #3 (gray arrow) for basal mitochondrial respiration and measure #10 (black arrow) for maximal mitochondrial respiration. Data are displayed as percentages of controls (i.e., untreated condition) ( $n = 3$ ,  $N = 4$ ). The baseline (100%) was established before the first injection, namely before glucose injection for the glycolytic capacity and before oligomycin injection for the mitochondrial respiration.

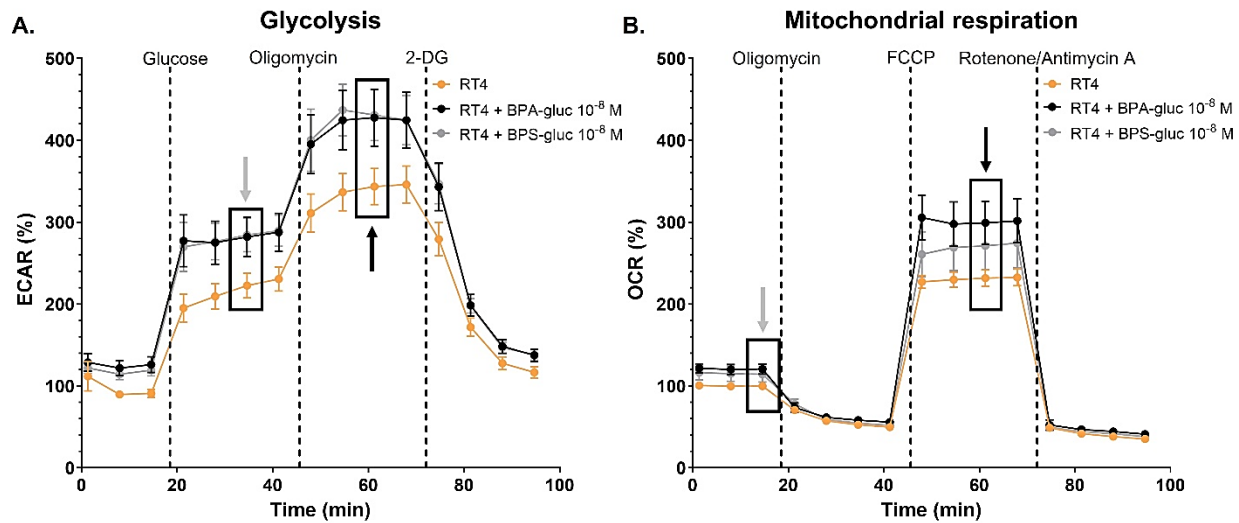

**Figure S2. Impact of BPA-gluc and BPS-gluc on the glycolytic and mitochondrial metabolism of RT4 non-invasive bladder cancer cells.** (A) The glycolytic metabolism was established by the sequential injections of glucose, oligomycin and 2-DG. Analyses in Figure 2A-B were performed using measure #6 (gray arrow) for basal glycolysis and measure #10 (black arrow) for maximal glycolytic capacity. (B) The mitochondrial respiration was established by sequential injections of oligomycin, FCCP and the combination of rotenone and antimycin A. Analyses in Figure 2C-D were performed using measure #3 (gray arrow) for basal mitochondrial respiration and measure #10 (black arrow) for maximal mitochondrial respiration. Data are displayed as percentages of controls (i.e., untreated condition) ( $n = 3$ ,  $N = 3$ ). The baseline (100%) was established before the first injection, namely before glucose injection for the glycolytic capacity and before oligomycin injection for the mitochondrial respiration.

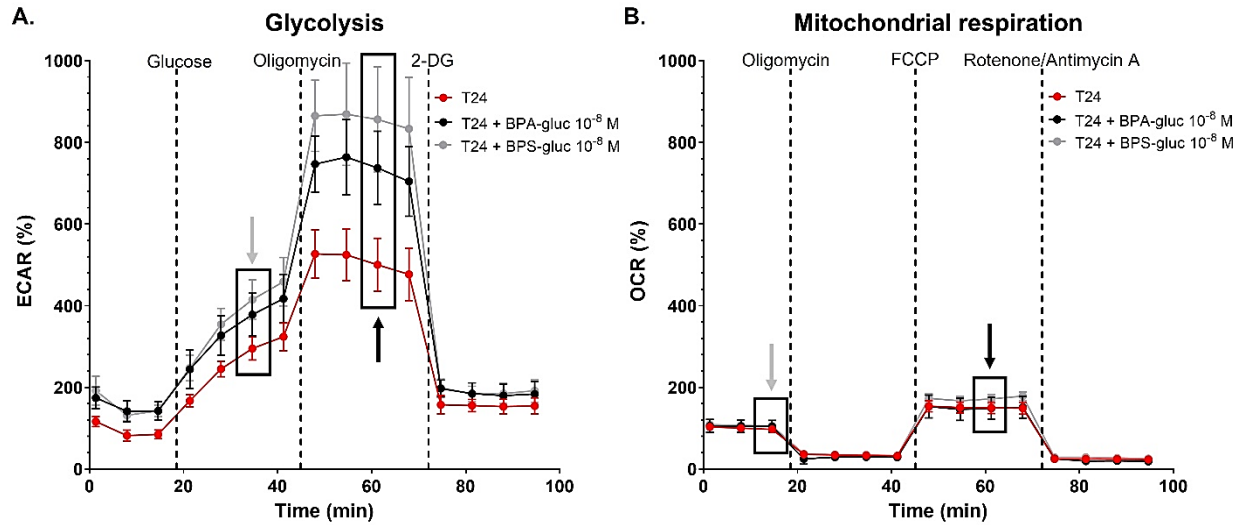

**Figure S3. Impact of BPA-gluc and BPS-gluc on the glycolytic and mitochondrial metabolism of T24 invasive bladder cancer cells.** (A) The glycolytic metabolism was established by the sequential injections of glucose, oligomycin and 2-DG. Analyses in Figure 3A-B were performed using measure #6 (gray arrow) for basal glycolysis and measure #10 (black arrow) for maximal glycolytic capacity. (B) The mitochondrial respiration was established by sequential injections of oligomycin, FCCP and the combination of rotenone and antimycin A. Analyses in Figure 3C-D were performed using measure #3 (gray arrow) for basal mitochondrial respiration and measure #10 (black arrow) for maximal mitochondrial respiration. Data are displayed as percentages of controls (i.e., untreated condition) ( $n = 3$ ,  $N = 3$ ). The baseline (100%) was established before the first injection, namely before glucose injection for the glycolytic capacity and before oligomycin injection for the mitochondrial respiration.
